# Supplementary material for: Predictors of Response to a Medial Branch Block: MRI Analysis of the Lumbar Spine
Source: MDPI journal article supplement (doi:10.3390/jcm8040538), 2019-04-19
Supplement: s1 [file s1]

Supplement Table S1. Spearman's rank correlation coefficients and their statistical significance between the numeric rating scale and facet angle difference at L3–4, disc height at L5–S1.

| Variables               | L3-4 facet angle difference      |         | L5-S1 disc height                |         |
|-------------------------|----------------------------------|---------|----------------------------------|---------|
|                         | Spearman correlation coefficient | P value | Spearman correlation coefficient | P value |
| NRS difference (points) | 0.121                            | 0.168   | -0.209                           | 0.017   |
| NRS change (%)          | 0.163                            | 0.062   | -0.206                           | 0.019   |

NRS difference is defined by subtracting one-month NRS after MBB from baseline NRS. NRS change is defined by the NRS difference divided by baseline

NRS. NRS = numeric rating scale; MBB = medial branch block
